# Supplementary material for: Impact of subsequent birth and delivery mode for women with previous OASIS: systematic review and meta-analysis
Source: Springer Nature journal article supplement (doi:10.1007/s00192-016-3226-y), 2016-12-26

**Appendix S4.**  **Meta-analyses with studies using data from women with a previous OASIS having a subsequent birth from 2003 onwards**

**Figure S4a.** Reported incidence ofAI in women with previous OASIS: no subsequent birth versus subsequent birth

**
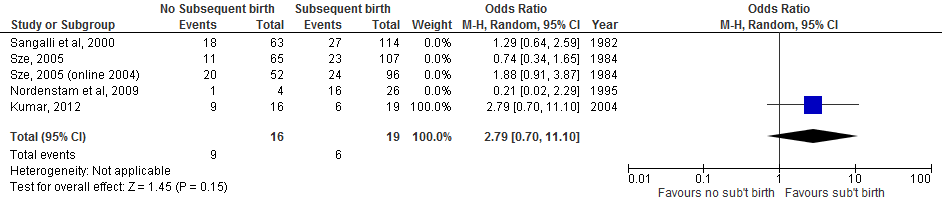
**

*Meta analysis not possible as only one study (Kumar et al, 2012) suitable for inclusion*

**Figure S4b.** Reported incidence of AI in women with previous OASIS: pre- versus post-subsequent birth


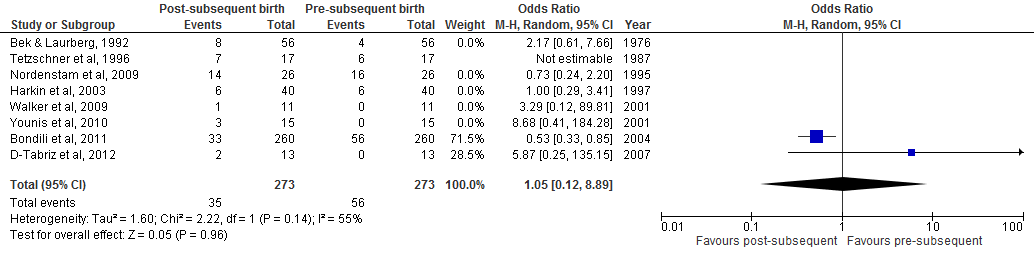


**Figure S4c.** Incidence of worsening of or de novo symptoms of AI in women with previous OASIS: subsequent vaginal birth versus subsequent caesarean section


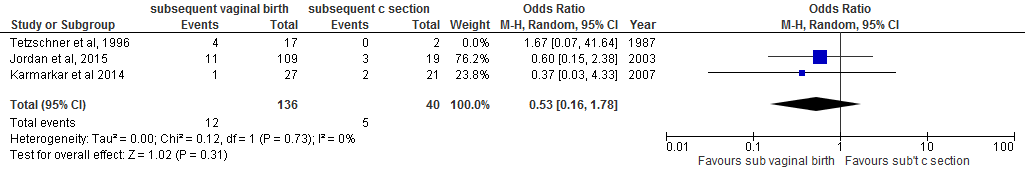

Supplement: MOESM4 [file 11959806]
