# Supplementary material for: Impact of subsequent birth and delivery mode for women with previous OASIS: systematic review and meta-analysis
Source: Springer Nature journal article supplement (doi:10.1007/s00192-016-3226-y), 2016-12-26
Supplement: MOESM5 [file 11959806]

**Figure S1**

Quality assessment criteria for 25 included cohort NRSs using Joanna Briggs Institute Prevalence Critical Appraisal Tool
